# Supplementary material for: Self-assembled structures of polyhedral gold nanocrystals: shape-directive arrangement and structure-dependent plasmonic enhanced characteristics
Source: Royal Society of Chemistry journal article supplement (doi:10.1039/c6ra12868h), 2016-01-01
Supplement: c6ra12868h1.pdf [file c6ra12868h1.pdf]

## Electronic Supplementary Information

### Self-assembled Structures of Polyhedral Gold Nanocrystals:

### Shape-directive arrangement and Structure-dependence

### Plasmonic Enhanced Characteristics

Yanting Liu,<sup>a</sup> Jun Zhou,<sup>\*a</sup> Lu Zhou,<sup>a</sup> Edwin Yue-Bun Pun,<sup>b</sup> Tao Jiang,<sup>a</sup>

Lucia Petti<sup>c</sup> and Pasquale Mormile<sup>c</sup>

*a. Institute of Photonics, Faculty of Science, Ningbo University, Ningbo 315211, China. Corresponding author: Email: zhoujun@nbu.edu.cn; Tel: +86-574-87600794; Fax: +86-574-87600744.*

*b. Department of Electronic Engineering and State Key Laboratory of Millimeter Waves, City University of Hong Kong, Tat Chee Avenue, Kowloon, China*

*c. Institute of Applied Sciences and Intelligent Systems "E. Caianiello" of CNR, Via Campi Flegrei, 34 - Comprensorio Olivetti, 80078 Pozzuoli (Napoli), Italy.*

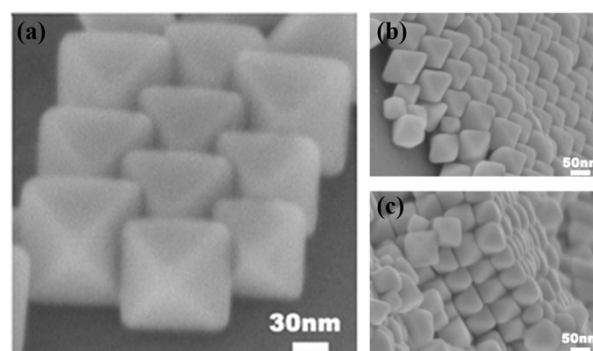

**Fig. S1** The side view SEM images of (a) local magnification, (b) single layer and (c) multilayer self-assembled structures of octahedral Au NCs

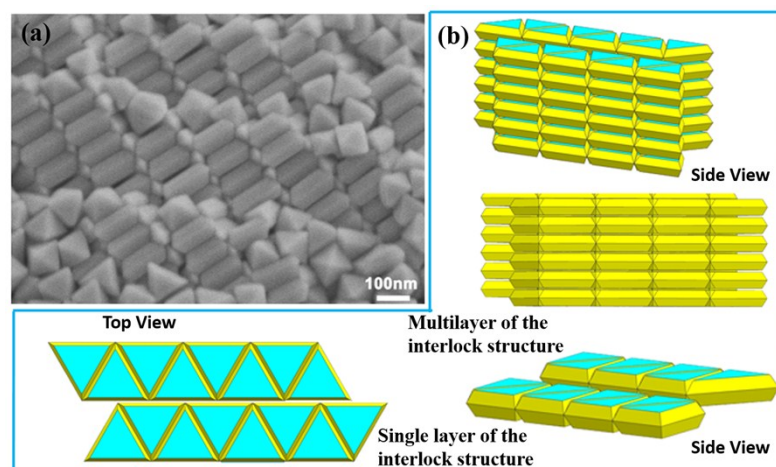

**Fig. S2** SEM image of self-assembled structures of truncated bitetrahedral Au NCs (a) and schematic 3D constructive models of assembly pattern of the building blocks (b)

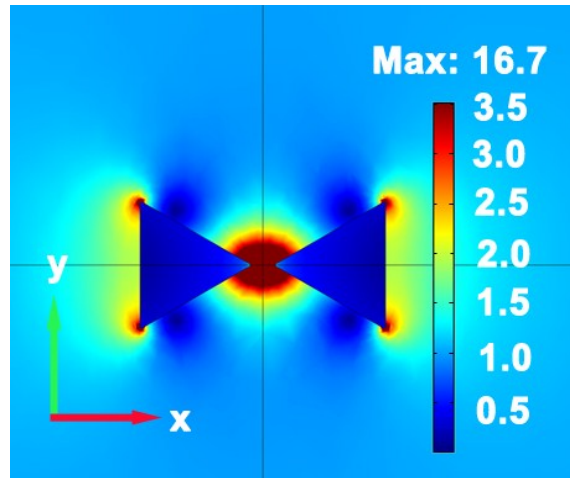

**Fig. S3.** The distributions of electric field of bowtie nanostructure under the incident plane-wave with the 785nm wavelength and the polarization direction along x axis.

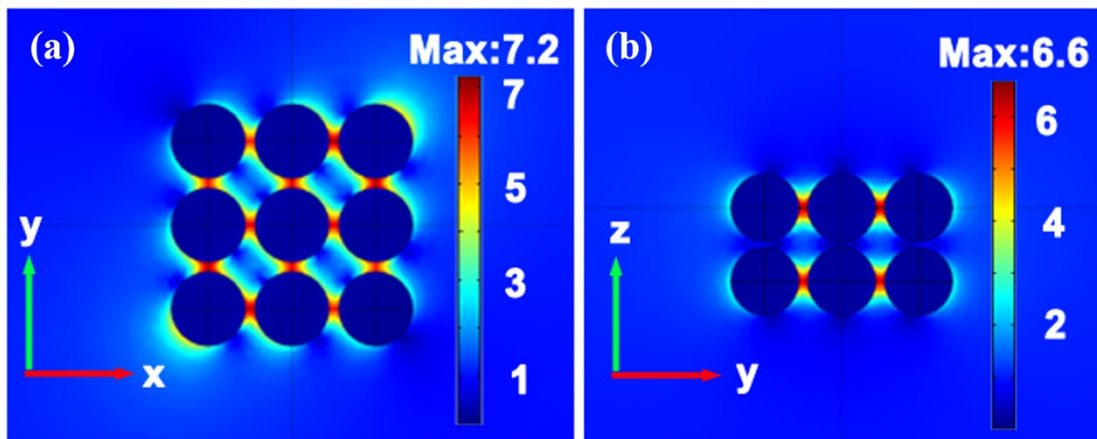

**Fig. S4** The distributions of electric fields of Au nanosphere arrays in (a) x-y plane and (b) y-z plane. Au nanosphere with a diameter of 80nm and the incident plane-wave with the 785nm wavelength and the polarization direction along x axis.
